# Supplementary material
Source: PubMed Central journal article supplement (PMC3107319)
Supplement: 1105398108_pnas.201105398SI.pdf [file 1105398108_pnas.201105398SI.pdf]

# Supporting Information

Zhao et al. 10.1073/pnas.1105398108

## SI Materials and Methods

**miR-146a KO Mice.** Briefly, a targeting construct where 295 base pairs of genomic sequence containing mouse premiR-146a were replaced with a floxed neomycin expression cassette was electroporated into Bruce4 ES cell line to generate miR-146a<sup>-/-</sup> mouse on the pure C57BL/6 background. Absence of miR-146a expression was confirmed in various hematopoietic organs by Northern blotting. Subsequent genotyping was done by duplex PCR with primers mir146a-WT-F (5' - CTT GGA CCA GCA GTC CTC TTG ATG CAC CTT - 3'), mir146a-KO-F (5' - ATC GCG GCC GCT TTA AGT GTA GAG AGG GGG TCA AGT A - 3'), and mir146a-R (5' - ATT GCT CAG CGG TGC TGT CCA TCT GCA CGA - 3') and the following PCR conditions: 94 °C for 3 min; 94 °C for 30 s, 55 °C for 30 s, 72 °C for 1 min, for 35 cycles; 72 °C for 10 min. The wild-type allele is about 900 bp and KO allele is about 700 bp.

**Histology, Immunohistochemistry, and Complete Blood Count.** For histological and immunohistochemical analysis, necropsied organs were fixed in 10% neutral-buffered formalin. All histology, immunohistochemistry, and complete blood count analysis were performed by the University of California, Los Angeles Pathology Research Services.

**Quantitative RT-PCR.** Total RNA was extracted with TRIzol reagent (Invitrogen) from total nucleated splenocytes, bone marrow cells, and CD11b<sup>+</sup>-enriched splenocytes after red blood cell lysis (Biolegend). CD11b<sup>+</sup> enriched splenocytes were purified by CD11b antibody-conjugated MACS beads (Miltenyi Biotec) according to the manufacturer's instructions. cDNA was synthesized using iScript cDNA synthesis kit (Bio-Rad) followed by

SYBR Green-based quantitative PCR (Applied Biosystems), as previously described (1). Rpl32 level was used as the normalization.

**Western Blot Analysis.** Nuclear protein lysates were extracted using nuclear extraction kit (Sigma) according to the manufacturer's instructions. Antibodies against p65 (sc-8008 and sc-372), laminA/C (sc-20681), and HRP-conjugated secondary antibody (sc-2031 and sc-2004, all from Santa Cruz Biotechnology) were used for detection.

**Flow Cytometry.** Cells were harvested, homogenized, and red blood cells lysed with red blood cell lysis buffer (Biolegend). Fluorophore-conjugated antibodies against CD3ε, CD11b, CD19, Ter119, Gr1 (all from Biolegend) and CSF1R (Ebioscience) were used for staining. Cells were analyzed on a FACSCalibur (BD Bioscience) machine and data analysis was performed with FloJo software (Tree Star).

**Statistical Analysis.** All statistical analyses were performed using Prism 5 software (GraphPad). The log-rank Mantel-Cox test was used to determine statistical significance in Kaplan-Meier survival curve. The  $\chi^2$  test was used to compare tumor incidence between wild-type and miR-146a<sup>-/-</sup> mice and between the expected and observed distribution of offspring from p50<sup>+/-</sup> miR-146a<sup>+/-</sup> intercross. Relationship between spleen weight and percent CD11b was analyzed with correlation test. All other statistical analyses were performed with the *F*-test first to determine whether variances are different and then with the correct Student *t* test. *P* values less than 0.05 in *t* tests were considered statistically significant.

1. O'Connell RM, et al. (2008) Sustained expression of microRNA-155 in hematopoietic stem cells causes a myeloproliferative disorder. *J Exp Med* 205:585-594.

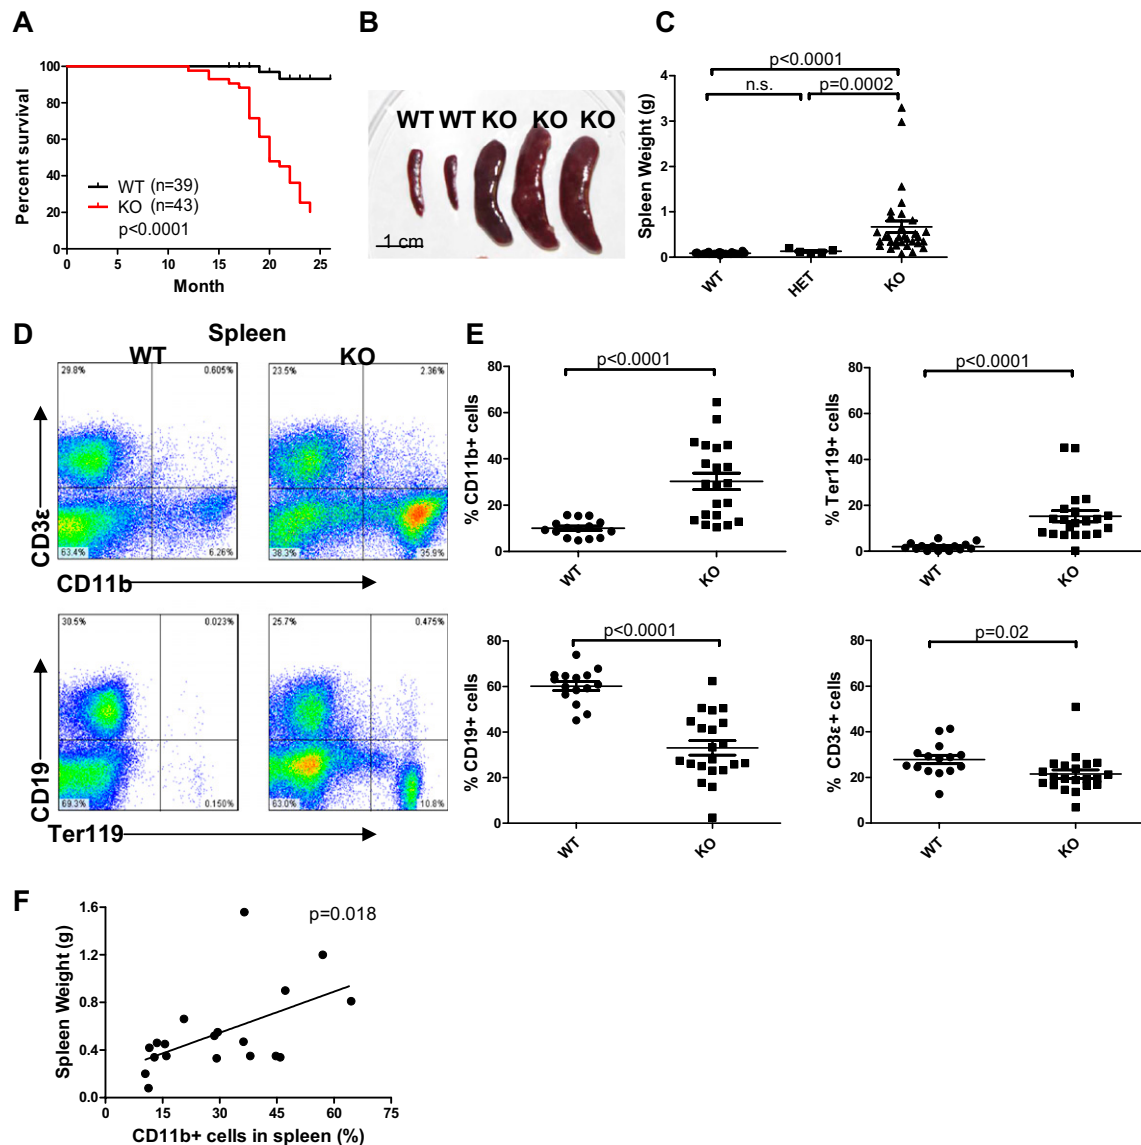

**Fig. 51.** miR-146a-deficient mice develop myeloproliferation in spleens. Mice were 18- to 22-mo-old miR-146a<sup>-/-</sup> mice (KO), miR-146a<sup>+/-</sup> mice (HET), and sex- and age-matched C57BL/6 control mice (WT). Data are shown as mean ± SEM. Each individual dot represents one individual mouse. At least three independent experiments were performed. (A) Kaplan-Meier survival curve of aging miR-146a KO and wild-type mice starting at 1 y of age ( $n = 39$  for WT and  $n = 43$  for KO). (B) Photographs of spleens isolated from KO and wild-type mice. (C) Weight of spleens isolated from KO, HET, and wild-type mice ( $n = 26$  for WT,  $n = 5$  for HET, and  $n = 33$  for KO). (D) Flow cytometric analysis of nucleated splenocytes from one representative KO mouse and one representative wild-type mouse for T cells (defined as CD3 $\epsilon^+$ ), B cells (defined as CD19 $^+$ ), myeloid cells (defined as CD11b $^+$ ), and erythroid cells (defined as Ter119 $^+$ ). (E) Percentage of T cells, B cells, myeloid cells, and erythroid cells, as defined above, in nucleated splenocytes in KO and wild-type mice by flow cytometry ( $n = 15$  for WT and  $n = 21$  for KO from at least three independent experiments). (F) Correlation between spleen weight and percentage CD11b $^+$  cells in spleen from 18- to 22-mo-old miR-146a-deficient mice ( $n = 19$ ).

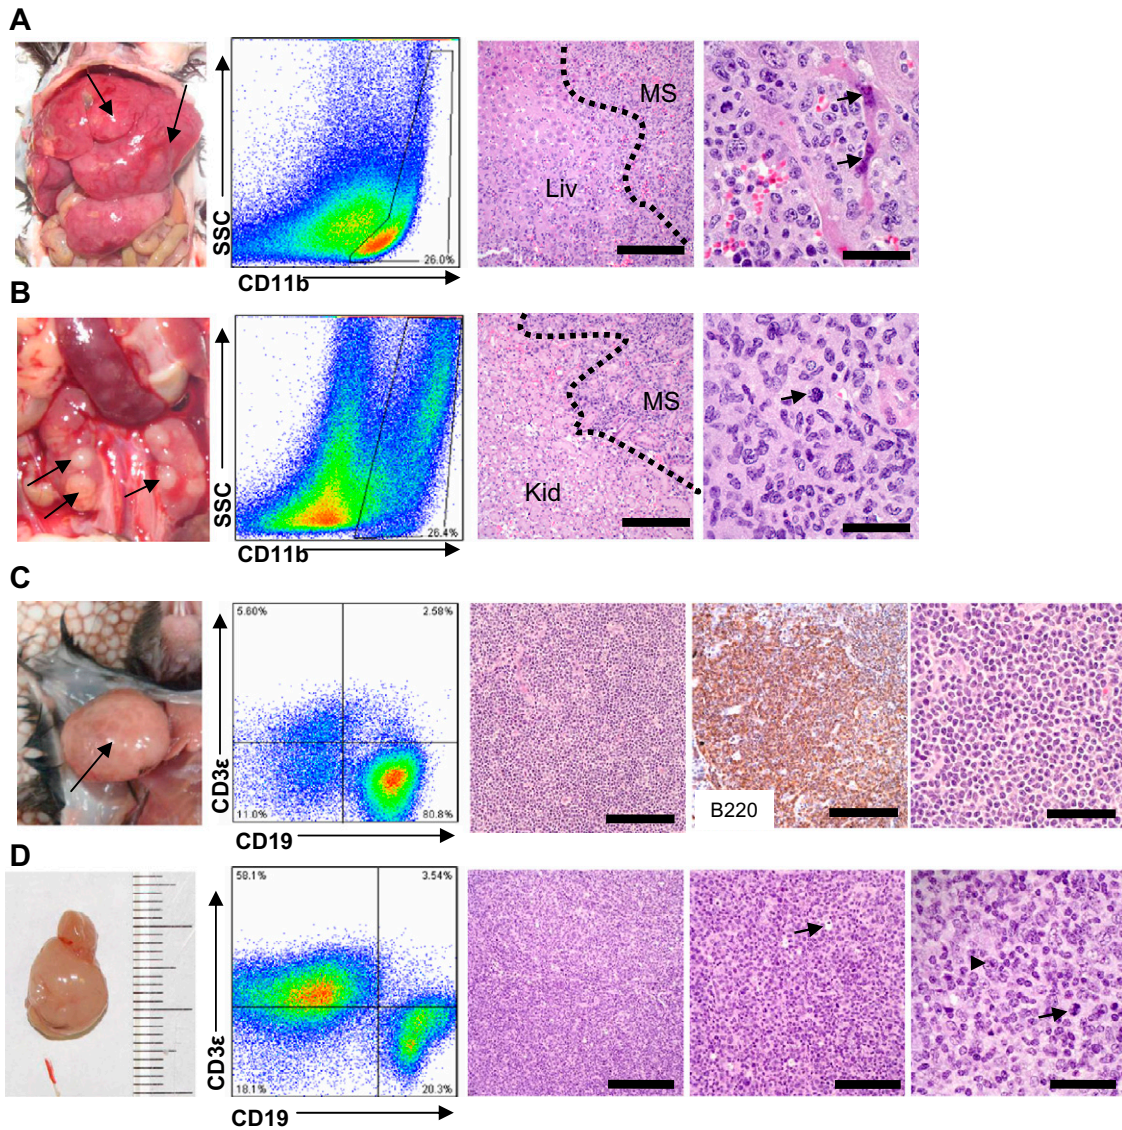

**Fig. S2.** Additional examples of myeloid and lymphoid malignancies in miR-146a-deficient mice. (A) Photograph, FACS plot, and histological analysis of a representative myeloid tumor infiltrating a KO liver. Panels 3 and 4 show an H&E-stained liver section. Liv, residual liver, MS, myeloid sarcoma infiltration. [Scale bars, (panel 3) 200  $\mu$ m; (panel 4) 40  $\mu$ m.] Arrows, apoptotic hepatocytes at the edge of the infiltrate. (B) Photograph, FACS plot, and histological analysis of a representative myeloid tumor infiltrating a KO kidney. Panels 3 and 4 show an H&E-stained kidney section. Kid, residual uninvolved kidney; MS, myeloid sarcoma infiltration. [Scale bars, (panel 3) 200  $\mu$ m; (panel 4) 40  $\mu$ m.] Arrow, markedly atypical mitotic figure. (C) Photograph, FACS plot, and histological analysis of a representative B-cell lymphoma from a KO cervical lymph node. Panels 3 and 5 show an H&E-stained spleen section. Panel 4: Positive immunohistochemical staining for B220. [Scale bar, 100  $\mu$ m (panels 3 and 4); 40  $\mu$ m (panel 5).] (D) Photograph, FACS plot, and histological analysis of a representative mixed T- and B-cell lymphoma from a KO gastrointestinal tract. Panels 3–5 show an H&E-stained tumor section. [Scale bars, (Left to Right) 200  $\mu$ m, 100  $\mu$ m, and 40  $\mu$ m.] Arrow on panel 4, apoptotic body (“starry sky appearance”); arrowhead on panel 5, large immunoblastic cell (there are many more in this field); arrow on panel 5, atypical mitotic figure.

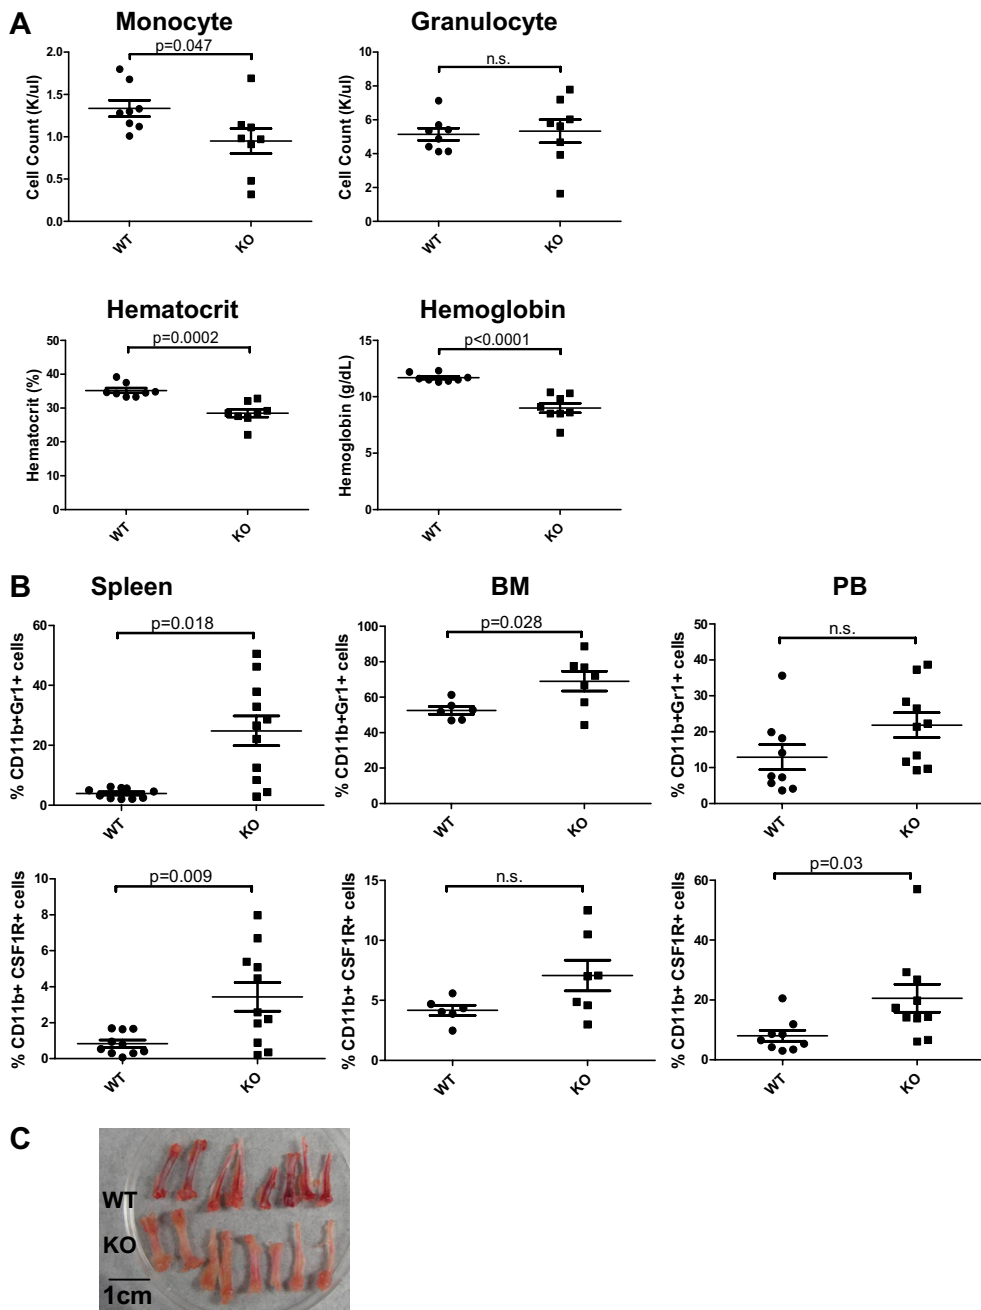

**Fig. S3.** Cell count and flow cytometric analysis of peripheral blood, spleen, and bone marrow. (A) Complete blood count of peripheral blood from 18- to 22-mo-old miR-146a<sup>-/-</sup> mice (KO,  $n = 8$ ) and sex- and age-matched wild-type control mice (WT,  $n = 8$ ). Data are shown as mean  $\pm$  SEM. Each individual dot represents one individual mouse. n.s., not significant. (B) Percentage of CD11b/Gr1 double-positive cells and CD11b/CSF1R double-positive cells in spleen, bone marrow (BM), and peripheral blood (PB) of 18- to 22-mo-old miR-146a<sup>-/-</sup> mice (KO) and sex- and age-matched wild-type control mice (WT). Data are shown as mean  $\pm$  SEM. Each individual dot represents one individual mouse. Total number of mice ranges from 6 to 11 from three independent experiments. n.s., not significant. (C) Photograph of representative tibias and fibulas isolated from wild-type or KO mice.

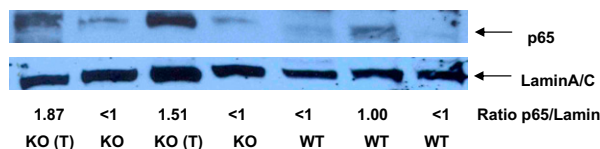

**Fig. S4.** Western blot analysis of the nuclear protein extracts from spleens of 18- to 22-mo-old miR-146a<sup>-/-</sup> mice (KO) and sex- and age-matched wild type control. KO (T), KO spleen with myeloid sarcoma; KO, KO spleen without myeloid sarcoma.

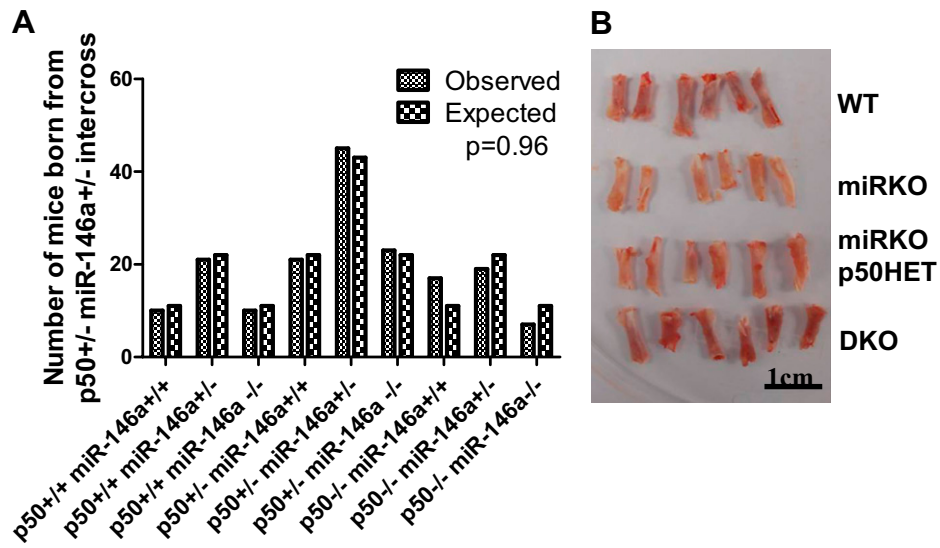

**Fig. 55.** (A) Number of offspring ( $n = 173$ ) produced from  $p50^{+/-}$  miR-146a<sup>+/-</sup> double heterozygote intercross. (B) Photograph of tibias from wild-type, miRKO, miRKO p50HET, and DKO mice.
